# Supplementary material for: Head-to-Head Comparison of Modular Vaccines Developed Using Different Capsid Virus-Like Particle Backbones and Antigen Conjugation Systems
Source: MDPI journal article supplement (doi:10.3390/vaccines9060539), 2021-05-21
Supplement: s1 [file s1]

Supplementary Material

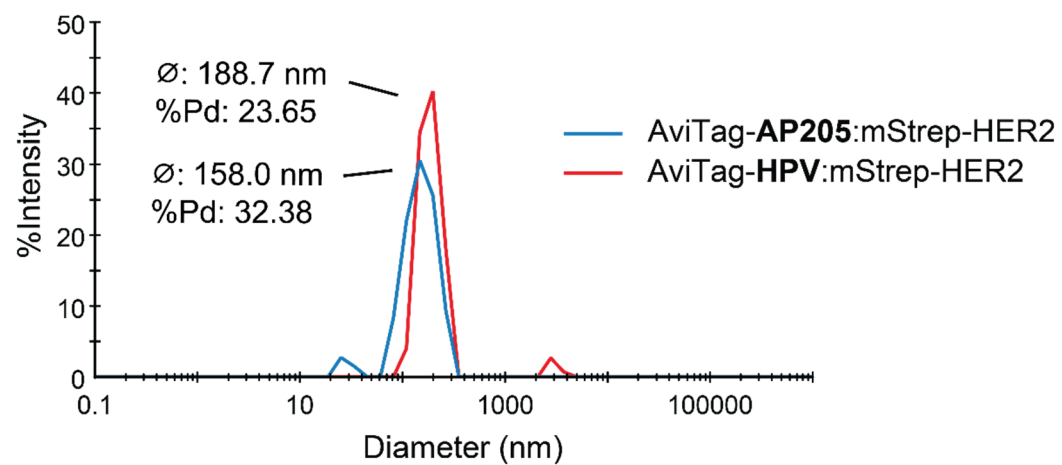

**Figure S1.** Dynamic light scattering of mStrep-HER2 vaccines: Regularization graph shows the size distributions of the mStrep-HER2 vaccines (AviTag-AP205:mStrep-HER2 (blue) and AviTag-HPV:mStrep-HER2 (red)).

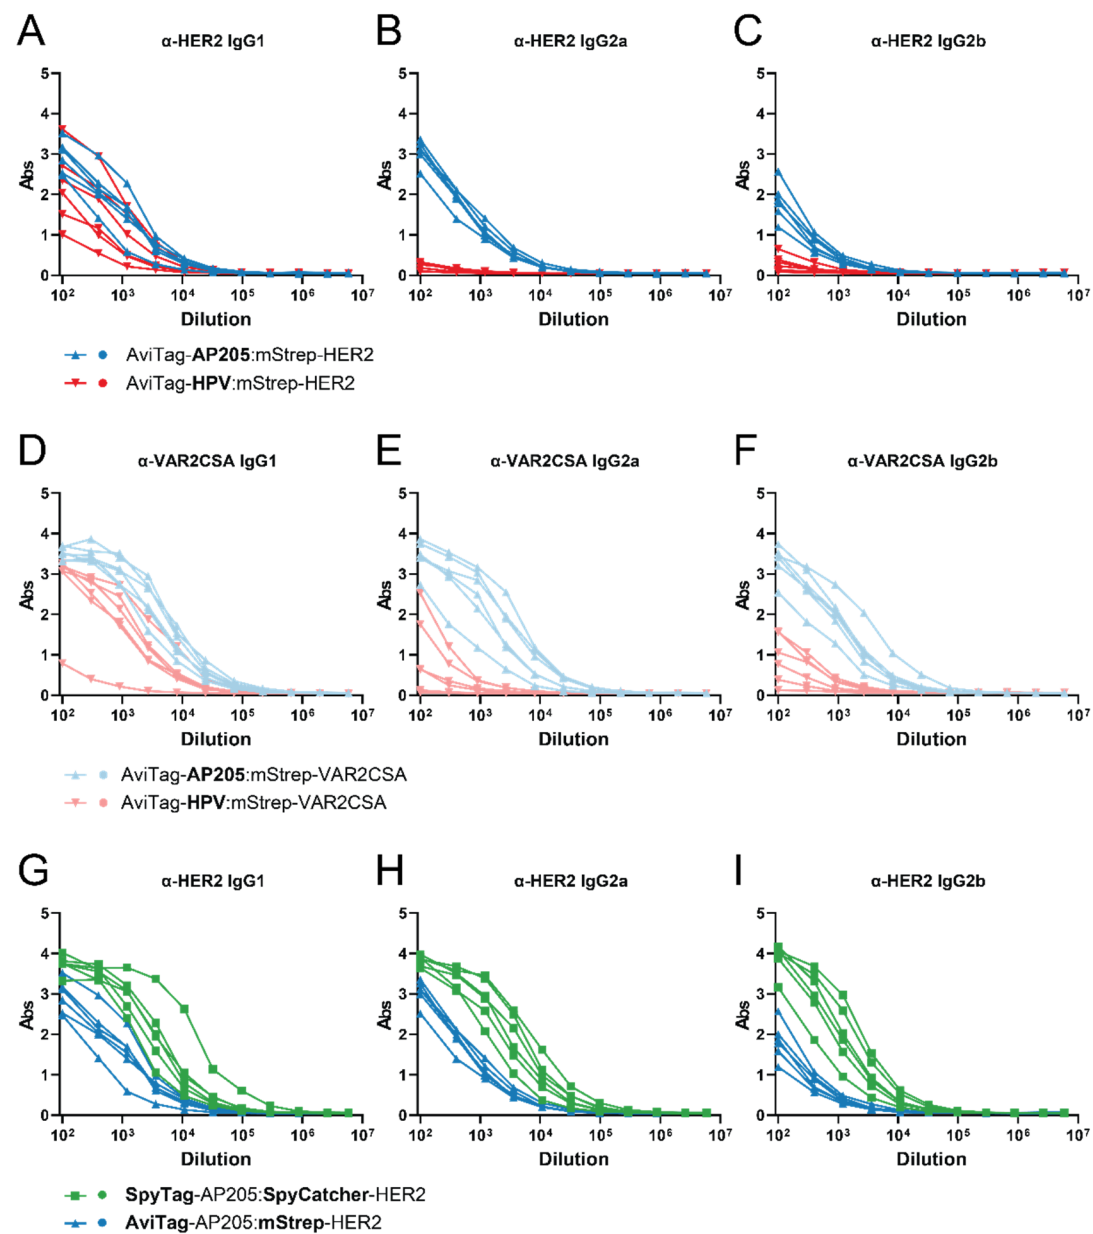

**Figure S2.** Effect of cVLP backbone and conjugation system on IgG profile. Full dilution curves showing the antigen specific antibody response with respect to different IgG sub-classes.

**Table S1.** Detailed explanation on how the coupling efficiency was calculated.

| Vaccine                     | Protein Mass (kDa) |                | Relative Protein Quantity |                | Coupling Efficiency |
|-----------------------------|--------------------|----------------|---------------------------|----------------|---------------------|
|                             | AviTag-cVLP        | mStrep-Antigen | AviTag-cVLP               | mStrep-Antigen |                     |
| AviTag-AP205:mStrep-HER2    | 16.5               | 84             | 1                         | 1.23           | 0.2                 |
| AviTag-HPV:mStrep-HER2      | 56                 | 84             | 1                         | 0.45           | 0.3                 |
| AviTag-AP205:mStrep-VAR2CSA | 16.5               | 85.4           | 1                         | 5.48           | 1.0                 |
| AviTag-HPV:mStrep-VAR2CSA   | 56                 | 85.4           | 1                         | 1.37           | 0.9                 |

  

| Vaccine                      | Protein Mass (kDa) |                    | Relative Protein Quantity       |                                 | Coupling Efficiency |
|------------------------------|--------------------|--------------------|---------------------------------|---------------------------------|---------------------|
|                              | SpyTag-cVLP        | SpyCatcher-Antigen | SpyTag-cVLP :SpyCatcher-Antigen | SpyTag-cVLP :SpyCatcher-Antigen |                     |
| SpyTag-AP205:SpyCatcher-HER2 | 16.5               | 83                 | 99.5                            | 2.54                            | 0.3                 |

The coupling efficiency (number of antigens bound per cVLP subunit) was determined by SDS-PAGE densitometric analysis. Specifically, Image Lab 6.0.1 (BioRad) was used to measure the quantity of protein bands in each lane of the SDS-PAGE gel. A disk size of 8.0 mm was used for background subtraction. For the vaccine utilizing the SpyTag/SpyCatcher system, the conjugated antigen does not dissociate from the cVLP subunit during reduced SDS-PAGE. On the contrary, for vaccines utilizing the AviTag/mStrep system, the antigen will dissociate during reduced SDS-PAGE. For this reason, the exact method of calculating the coupling efficiency differs slightly between the two systems, as seen below.

$$\text{Antigen/cVLP ratio}_{\text{AviTag-HPV:mStrep-HER2}} = \frac{\frac{0.45}{84 \text{ kDa}}}{\frac{1}{56 \text{ kDa}}} = 0.3$$

$$\text{Antigen/cVLP ratio}_{\text{SpyTag-AP205:SpyCatcher-HER2}} = \frac{\frac{2.54}{99.5 \text{ kDa}}}{\frac{2.54}{99.5 \text{ kDa}} + \frac{1}{16.5 \text{ kDa}}} = 0.3$$
